## Avian distributions under climate change: towards improved projections

F. A. La Sorte and W. Jetz

10.1242/jeb.044610

There was an error published in *J. Exp. Biol.* **213**, 862-869.

The following references were omitted from the Reference list:

- Buckley, L. B.** (2008). Linking traits to energetics and population dynamics to predict lizard ranges in changing environments. *Am. Nat.* **171**, E1-E19.  
**Helmuth, B., Kingsolver, J. G. and Carrington, E.** (2005). Biophysics, physiological ecology, and climate change: does mechanism matter? *Annu. Rev. Physiol.* **67**, 177-201.  
**Kearney, M. and Porter, W. P.** (2004). Mapping the fundamental niche: physiology, climate, and the distribution of a nocturnal lizard. *Ecology* **85**, 3119-3131.  
**Withers, P. C. and Williams, J. B.** (1990). Metabolic and respiratory physiology of an arid-adapted Australian bird, the spinifex pigeon. *Condor* **92**, 961-969.

We apologise to authors and readers for this error.
